# Supplementary material
Source: PubMed Central journal article supplement (PMC1852750)
Supplement: 7400912-s1.pdf [file 7400912-s1.pdf]

## Supplementary Data for Thin et al.

**Figure S1: Stra13<sup>-/-</sup> thymocytes exhibit increased viability, but normal cell cycle arrest in response to IR.** (A) WT and Stra13<sup>-/-</sup> thymocytes were irradiated with varying doses as indicated, and analyzed by AnnexinV-FITC and PI staining. The percentage of viable cells 14hrs post-irradiation are shown. (B) WT and Stra13<sup>-/-</sup> mice were irradiated (10 Gy), and 1 hr later given an intraperitoneal injection of 1mM BrdUrd/5-fluorodeoxyuridine (BrdU). Control mice were injected with BrdU but not irradiated. 1 hr after injection, mice were sacrificed and thymocytes were stained with anti-BrdU-FITC and 7-amino-actinomycin D (7-AAD) and analyzed by flow cytometry. Upon IR, the S-phase cells were reduced equivalently in WT and Stra13<sup>-/-</sup> mice indicating that activation of the G1/S checkpoint is not altered. The values are representative of at least three independent experiments.

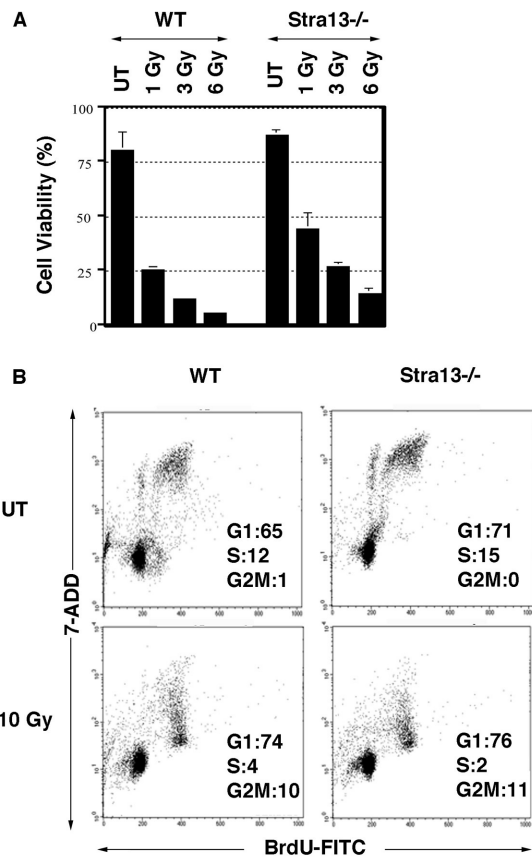

Supplementary Fig 1
